# Supplementary material for: Rapeseed oil-based hippurate amide nanocomposite coating material for anticorrosive and antibacterial applications
Source: publisher site journal article supplement (doi:10.1515/chem-2022-0193), 2022-01-01
Supplement: Supplementary file 1 [file chem-2022-0193_sm.pdf]

# Supplementary material

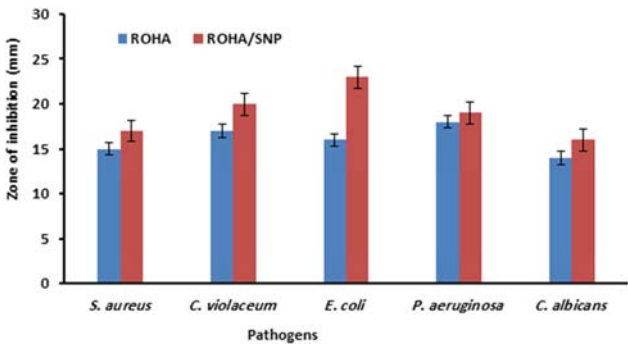

Figure S1: Antibacterial activity of ROHA and ROHA/SNP nanocomposite.

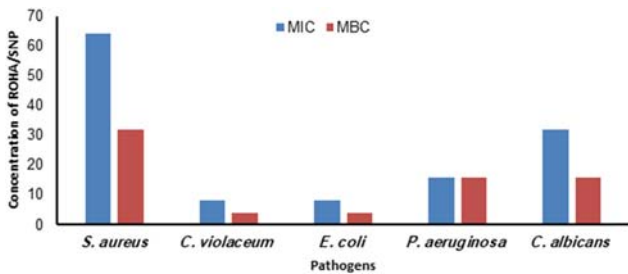

Figure S2: MIC and MBC of ROHA/SNP in with different pathogen.
